# Supplementary material for: Joint Analysis of Genome-Wide Association Data Reveals No Genetic Correlations Between Low Back Pain and Neurodegenerative Diseases
Source: PubMed Central journal article supplement (PMC8493037; doi:10.3389/fgene.2021.744299), 2021-09-22
Supplement: Data_Sheet_1.pdf [file Data_Sheet_1.pdf]

## Supplementary Material

**Supplementary Table 1.** Brief description of source datasets utilized in this study

**Supplementary Table 2.** Summary statistics utilized in the Mendelian randomization analysis of low back pain on neurodegenerative diseases

**Supplementary Table 3.** Summary statistics utilized in the Mendelian randomization analysis of neurodegenerative diseases on low back pain

**Supplementary Table 4.** Mendelian randomization analysis power estimation

**Supplementary Table 5.** MR-Egger regression intercepts examining unbalanced horizontal pleiotropy

**Supplementary Table 6.** Heterogeneity assessment by Cochran's Q statistics

**Supplementary Figure 1.** Scatter plots in the Mendelian randomization analyses of low back pain on neurodegenerative diseases

**Supplementary Figure 2.** Leave-one-out plots in the Mendelian randomization analyses of low back pain on neurodegenerative diseases

**Supplementary Figure 3.** Scatter plots in the Mendelian randomization analyses of neurodegenerative diseases on low back pain

**Supplementary Figure 4.** Leave-one-out plots in the Mendelian randomization analyses of neurodegenerative diseases on low back pain

**Supplementary Table 1.** Brief description of source datasets utilized in this study

| Traits                        | Sample size | Cases  | Controls | Ancestry | Access Link                                                                                     |
|-------------------------------|-------------|--------|----------|----------|-------------------------------------------------------------------------------------------------|
| Low back pain                 | 177,860     | 13,178 | 164,682  | European | <a href="https://r5.finngen.fi/">https://r5.finngen.fi/</a>                                     |
| Alzheimer's disease           | 63,926      | 21,982 | 41,944   | European | <a href="https://www.niagads.org/datasets/ng00075">https://www.niagads.org/datasets/ng00075</a> |
| Parkinson's disease           | 482,730     | 33,674 | 449,056  | European | <a href="https://pdgenetics.org/resources">https://pdgenetics.org/resources</a>                 |
| Amyotrophic lateral sclerosis | 80,610      | 20,806 | 59,804   | European | <a href="http://als.umassmed.edu/">http://als.umassmed.edu/</a>                                 |

**Supplementary Table 2.** Summary statistics utilized in the Mendelian randomization analysis of low back pain on neurodegenerative diseases

| Trait | SNP         | Coordinate (GRCh37) | EA | OA | EAF   | $R^2$ | $F$  | Association with LBP |       |                       | Association with outcome trait |       |            |
|-------|-------------|---------------------|----|----|-------|-------|------|----------------------|-------|-----------------------|--------------------------------|-------|------------|
|       |             |                     |    |    |       |       |      | Beta                 | SE    | $P$ -value            | Beta                           | SE    | $P$ -value |
| AD    | rs6426282   | 1:246310585         | C  | T  | 0.196 | 0.002 | 22.3 | -0.080               | 0.017 | $2.27 \times 10^{-6}$ | 0.006                          | 0.021 | 0.783      |
| AD    | rs56091004  | 6:3744847           | T  | C  | 0.061 | 0.002 | 23.9 | 0.140                | 0.029 | $1.05 \times 10^{-6}$ | -0.039                         | 0.028 | 0.171      |
| AD    | rs9469835   | 6:34611001          | G  | A  | 0.330 | 0.002 | 25.3 | 0.073                | 0.015 | $4.83 \times 10^{-7}$ | -0.005                         | 0.015 | 0.759      |
| AD    | rs112412403 | 6:129060572         | A  | G  | 0.038 | 0.002 | 21.7 | 0.169                | 0.036 | $3.15 \times 10^{-6}$ | -0.041                         | 0.070 | 0.555      |
| AD    | rs147356029 | 7:4042724           | A  | G  | 0.018 | 0.002 | 21.5 | 0.238                | 0.051 | $3.46 \times 10^{-6}$ | -0.040                         | 0.045 | 0.376      |
| AD    | rs143783757 | 7:79133344          | G  | A  | 0.021 | 0.002 | 21.2 | -0.220               | 0.048 | $4.06 \times 10^{-6}$ | -0.023                         | 0.068 | 0.732      |
| AD    | rs1481789   | 8:72040468          | A  | G  | 0.159 | 0.002 | 24.1 | 0.091                | 0.019 | $9.94 \times 10^{-7}$ | 0.008                          | 0.017 | 0.661      |
| AD    | rs4284332   | 10:73733952         | C  | T  | 0.557 | 0.002 | 22.6 | 0.065                | 0.014 | $2.10 \times 10^{-6}$ | 0.006                          | 0.015 | 0.690      |
| AD    | rs231908    | 11:2751660          | G  | A  | 0.755 | 0.003 | 27.8 | -0.083               | 0.016 | $1.42 \times 10^{-7}$ | -0.024                         | 0.018 | 0.179      |
| AD    | rs60127327  | 12:54627857         | G  | A  | 0.481 | 0.002 | 22.4 | -0.064               | 0.014 | $2.42 \times 10^{-6}$ | -0.031                         | 0.015 | 0.034      |
| AD    | rs941157    | 12:90776124         | T  | C  | 0.412 | 0.002 | 22.1 | -0.064               | 0.014 | $2.76 \times 10^{-6}$ | -0.006                         | 0.014 | 0.692      |

|    |             |             |   |   |       |       |      |        |       |                       |        |       |       |
|----|-------------|-------------|---|---|-------|-------|------|--------|-------|-----------------------|--------|-------|-------|
| AD | rs225880    | 14:30481804 | C | T | 0.786 | 0.002 | 22.7 | 0.078  | 0.016 | $1.94 \times 10^{-6}$ | -0.017 | 0.019 | 0.375 |
| AD | rs2022845   | 14:66343168 | T | G | 0.309 | 0.002 | 22.5 | -0.069 | 0.015 | $2.21 \times 10^{-6}$ | -0.011 | 0.015 | 0.448 |
| AD | rs72726942  | 15:31876216 | T | G | 0.026 | 0.002 | 21.7 | 0.202  | 0.043 | $3.17 \times 10^{-6}$ | 0.008  | 0.041 | 0.841 |
| AD | rs56807215  | 16:87951030 | A | T | 0.099 | 0.002 | 21.2 | -0.106 | 0.023 | $4.22 \times 10^{-6}$ | -0.022 | 0.033 | 0.504 |
| AD | rs62097992  | 18:50835863 | C | T | 0.412 | 0.002 | 23.5 | 0.067  | 0.014 | $1.17 \times 10^{-6}$ | -0.015 | 0.014 | 0.298 |
| AD | rs113679764 | 19:17486898 | A | G | 0.096 | 0.002 | 21.9 | 0.108  | 0.023 | $2.99 \times 10^{-6}$ | 0.042  | 0.032 | 0.195 |
| PD | rs6426282   | 1:246310585 | C | T | 0.196 | 0.002 | 22.3 | -0.080 | 0.017 | $2.27 \times 10^{-6}$ | 0.035  | 0.032 | 0.274 |
| PD | rs56091004  | 6:3744847   | T | C | 0.061 | 0.002 | 23.9 | 0.140  | 0.029 | $1.05 \times 10^{-6}$ | 0.040  | 0.038 | 0.289 |
| PD | rs9469835   | 6:34611001  | G | A | 0.330 | 0.002 | 25.3 | 0.073  | 0.015 | $4.83 \times 10^{-7}$ | -0.012 | 0.018 | 0.504 |
| PD | rs112412403 | 6:129060572 | A | G | 0.038 | 0.002 | 21.7 | 0.169  | 0.036 | $3.15 \times 10^{-6}$ | -0.006 | 0.075 | 0.932 |
| PD | rs147356029 | 7:4042724   | A | G | 0.018 | 0.002 | 21.5 | 0.238  | 0.051 | $3.46 \times 10^{-6}$ | 0.015  | 0.068 | 0.825 |
| PD | rs143783757 | 7:79133344  | G | A | 0.021 | 0.002 | 21.2 | -0.220 | 0.048 | $4.06 \times 10^{-6}$ | 0.022  | 0.085 | 0.797 |
| PD | rs1481789   | 8:72040468  | A | G | 0.159 | 0.002 | 24.1 | 0.091  | 0.019 | $9.94 \times 10^{-7}$ | 0.030  | 0.029 | 0.301 |
| PD | rs4284332   | 10:73733952 | C | T | 0.557 | 0.002 | 22.6 | 0.065  | 0.014 | $2.10 \times 10^{-6}$ | -0.015 | 0.023 | 0.506 |
| PD | rs231908    | 11:2751660  | G | A | 0.755 | 0.003 | 27.8 | -0.083 | 0.016 | $1.42 \times 10^{-7}$ | -0.026 | 0.028 | 0.345 |
| PD | rs60127327  | 12:54627857 | G | A | 0.481 | 0.002 | 22.4 | -0.064 | 0.014 | $2.42 \times 10^{-6}$ | -0.005 | 0.020 | 0.808 |
| PD | rs941157    | 12:90776124 | T | C | 0.412 | 0.002 | 22.1 | -0.064 | 0.014 | $2.76 \times 10^{-6}$ | -0.042 | 0.022 | 0.062 |

|     |             |             |   |   |       |       |      |        |       |                       |        |       |       |
|-----|-------------|-------------|---|---|-------|-------|------|--------|-------|-----------------------|--------|-------|-------|
| PD  | rs225880    | 14:30481804 | C | T | 0.786 | 0.002 | 22.7 | 0.078  | 0.016 | $1.94 \times 10^{-6}$ | -0.019 | 0.029 | 0.520 |
| PD  | rs2022845   | 14:66343168 | T | G | 0.309 | 0.002 | 22.5 | -0.069 | 0.015 | $2.21 \times 10^{-6}$ | -0.001 | 0.023 | 0.981 |
| PD  | rs72726942  | 15:31876216 | T | G | 0.026 | 0.002 | 21.7 | 0.202  | 0.043 | $3.17 \times 10^{-6}$ | -0.097 | 0.062 | 0.118 |
| PD  | rs56807215  | 16:87951030 | A | T | 0.099 | 0.002 | 21.2 | -0.106 | 0.023 | $4.22 \times 10^{-6}$ | 0.089  | 0.037 | 0.017 |
| PD  | rs62097992  | 18:50835863 | C | T | 0.412 | 0.002 | 23.5 | 0.067  | 0.014 | $1.17 \times 10^{-6}$ | 0.028  | 0.020 | 0.155 |
| PD  | rs113679764 | 19:17486898 | A | G | 0.096 | 0.002 | 21.9 | 0.108  | 0.023 | $2.99 \times 10^{-6}$ | 0.005  | 0.042 | 0.914 |
| ALS | rs6426282   | 1:246310585 | C | T | 0.196 | 0.002 | 22.3 | -0.080 | 0.017 | $2.27 \times 10^{-6}$ | 0.024  | 0.019 | 0.209 |
| ALS | rs56091004  | 6:3744847   | T | C | 0.061 | 0.002 | 23.9 | 0.140  | 0.029 | $1.05 \times 10^{-6}$ | 0.003  | 0.024 | 0.894 |
| ALS | rs9469835   | 6:34611001  | G | A | 0.330 | 0.002 | 25.3 | 0.073  | 0.015 | $4.83 \times 10^{-7}$ | -0.006 | 0.014 | 0.663 |
| ALS | rs112412403 | 6:129060572 | A | G | 0.038 | 0.002 | 21.7 | 0.169  | 0.036 | $3.15 \times 10^{-6}$ | -0.051 | 0.053 | 0.344 |
| ALS | rs147356029 | 7:4042724   | A | G | 0.018 | 0.002 | 21.5 | 0.238  | 0.051 | $3.46 \times 10^{-6}$ | -0.089 | 0.045 | 0.045 |
| ALS | rs143783757 | 7:79133344  | G | A | 0.021 | 0.002 | 21.2 | -0.220 | 0.048 | $4.06 \times 10^{-6}$ | 0.008  | 0.064 | 0.904 |
| ALS | rs1481789   | 8:72040468  | A | G | 0.159 | 0.002 | 24.1 | 0.091  | 0.019 | $9.94 \times 10^{-7}$ | -0.007 | 0.016 | 0.676 |
| ALS | rs4284332   | 10:73733952 | C | T | 0.557 | 0.002 | 22.6 | 0.065  | 0.014 | $2.10 \times 10^{-6}$ | -0.006 | 0.014 | 0.667 |
| ALS | rs231908    | 11:2751660  | G | A | 0.755 | 0.003 | 27.8 | -0.083 | 0.016 | $1.42 \times 10^{-7}$ | -0.006 | 0.017 | 0.707 |
| ALS | rs60127327  | 12:54627857 | G | A | 0.481 | 0.002 | 22.4 | -0.064 | 0.014 | $2.42 \times 10^{-6}$ | 0.001  | 0.014 | 0.956 |
| ALS | rs941157    | 12:90776124 | T | C | 0.412 | 0.002 | 22.1 | -0.064 | 0.014 | $2.76 \times 10^{-6}$ | -0.005 | 0.014 | 0.746 |

|     |             |             |   |   |       |       |      |        |       |                       |        |       |       |
|-----|-------------|-------------|---|---|-------|-------|------|--------|-------|-----------------------|--------|-------|-------|
| ALS | rs225880    | 14:30481804 | C | T | 0.786 | 0.002 | 22.7 | 0.078  | 0.016 | $1.94 \times 10^{-6}$ | -0.021 | 0.018 | 0.242 |
| ALS | rs2022845   | 14:66343168 | T | G | 0.309 | 0.002 | 22.5 | -0.069 | 0.015 | $2.21 \times 10^{-6}$ | -0.016 | 0.014 | 0.257 |
| ALS | rs72726942  | 15:31876216 | T | G | 0.026 | 0.002 | 21.7 | 0.202  | 0.043 | $3.17 \times 10^{-6}$ | 0.013  | 0.038 | 0.743 |
| ALS | rs56807215  | 16:87951030 | A | T | 0.099 | 0.002 | 21.2 | -0.106 | 0.023 | $4.22 \times 10^{-6}$ | 0.043  | 0.028 | 0.122 |
| ALS | rs62097992  | 18:50835863 | C | T | 0.412 | 0.002 | 23.5 | 0.067  | 0.014 | $1.17 \times 10^{-6}$ | 0.006  | 0.014 | 0.655 |
| ALS | rs113679764 | 19:17486898 | A | G | 0.096 | 0.002 | 21.9 | 0.108  | 0.023 | $2.99 \times 10^{-6}$ | -0.008 | 0.032 | 0.816 |

Note: As for instrumental SNPs for the exposure, proportion of variance explained was calculated using formula:  $R^2 = 2 \times \text{EAF} \times (1-\text{EAF}) \times \text{Beta}^2$ . Strength of individual SNP was approximated by the formula:  $F\text{-statistic} = (\text{Beta}/\text{SE})^2$ , where  $F < 10$  was seen as a weak instrument.

Abbreviations: AD, Alzheimer's disease; ALS, amyotrophic lateral sclerosis; EA, effect allele; EAF, effect allele frequency of instrumental SNP associated with the exposure; LBP, low back pain; SE, standard error; OA, other allele; PD, Parkinson's disease; SNP, single nucleotide polymorphism.

**Supplementary Table 3.** Summary statistics utilized in the Mendelian randomization analysis of neurodegenerative diseases on low back pain

| Trait | SNP         | Coordinate (GRCh37) | EA | OA | EAF   | $R^2$ | F     | Association with exposure trait |       |                        | Association with LBP |       |            |
|-------|-------------|---------------------|----|----|-------|-------|-------|---------------------------------|-------|------------------------|----------------------|-------|------------|
|       |             |                     |    |    |       |       |       | Beta                            | SE    | $P$ -value             | Beta                 | SE    | $P$ -value |
| AD    | rs679515    | 1:207750568         | C  | T  | 0.828 | 0.006 | 70.4  | -0.151                          | 0.018 | $1.55 \times 10^{-16}$ | -0.005               | 0.017 | 0.777      |
| AD    | rs6733839   | 2:127892810         | T  | C  | 0.380 | 0.014 | 126.9 | 0.169                           | 0.015 | $4.02 \times 10^{-28}$ | -0.006               | 0.014 | 0.700      |
| AD    | rs114812713 | 6:41034000          | C  | G  | 0.028 | 0.005 | 48.0  | 0.298                           | 0.043 | $4.47 \times 10^{-12}$ | 0.188                | 0.068 | 0.006      |
| AD    | rs9381563   | 6:47432637          | T  | C  | 0.322 | 0.003 | 29.9  | -0.082                          | 0.015 | $2.93 \times 10^{-8}$  | -0.013               | 0.016 | 0.420      |
| AD    | rs11767557  | 7:143109139         | C  | T  | 0.218 | 0.004 | 32.7  | -0.103                          | 0.018 | $1.56 \times 10^{-8}$  | -0.025               | 0.018 | 0.176      |
| AD    | rs73223431  | 8:27219987          | T  | C  | 0.346 | 0.004 | 39.3  | 0.094                           | 0.015 | $8.34 \times 10^{-10}$ | -0.021               | 0.014 | 0.142      |
| AD    | rs867230    | 8:27468503          | A  | C  | 0.598 | 0.009 | 69.1  | 0.133                           | 0.016 | $3.49 \times 10^{-17}$ | -0.013               | 0.014 | 0.340      |
| AD    | rs11257242  | 10:11721119         | G  | C  | 0.651 | 0.003 | 31.4  | 0.084                           | 0.015 | $4.64 \times 10^{-8}$  | -0.010               | 0.014 | 0.459      |
| AD    | rs3740688   | 11:47380340         | T  | G  | 0.543 | 0.004 | 45.1  | 0.094                           | 0.014 | $9.70 \times 10^{-11}$ | 0.006                | 0.015 | 0.704      |
| AD    | rs1582763   | 11:60021948         | A  | G  | 0.363 | 0.007 | 67.2  | -0.123                          | 0.015 | $1.19 \times 10^{-16}$ | 0.009                | 0.015 | 0.548      |
| AD    | rs3851179   | 11:85868640         | C  | T  | 0.629 | 0.007 | 64.0  | 0.120                           | 0.015 | $5.81 \times 10^{-16}$ | 0.018                | 0.014 | 0.197      |
| AD    | rs12590654  | 14:92938855         | A  | G  | 0.337 | 0.004 | 32.3  | -0.091                          | 0.016 | $8.73 \times 10^{-9}$  | 0.008                | 0.015 | 0.601      |

|    |             |             |   |   |       |       |       |        |       |                         |        |       |       |
|----|-------------|-------------|---|---|-------|-------|-------|--------|-------|-------------------------|--------|-------|-------|
| AD | rs12151021  | 19:1050874  | G | A | 0.662 | 0.005 | 39.6  | -0.107 | 0.017 | $2.56 \times 10^{-10}$  | -0.012 | 0.015 | 0.431 |
| AD | rs111278137 | 19:45215081 | A | G | 0.014 | 0.006 | 44.6  | -0.474 | 0.071 | $3.20 \times 10^{-11}$  | 0.070  | 0.068 | 0.305 |
| AD | rs147711004 | 19:45337918 | A | G | 0.029 | 0.072 | 941.0 | 1.135  | 0.037 | $1.00 \times 10^{-200}$ | -0.071 | 0.034 | 0.036 |
| AD | rs7412      | 19:45412079 | T | C | 0.063 | 0.026 | 226.9 | -0.467 | 0.031 | $6.40 \times 10^{-53}$  | 0.037  | 0.030 | 0.219 |
| AD | rs1081105   | 19:45412955 | C | A | 0.031 | 0.053 | 458.3 | 0.942  | 0.044 | $1.51 \times 10^{-103}$ | -0.071 | 0.048 | 0.142 |
| AD | rs72654445  | 19:45417200 | A | G | 0.011 | 0.006 | 44.9  | -0.543 | 0.081 | $2.27 \times 10^{-11}$  | -0.073 | 0.066 | 0.273 |
| AD | rs139136389 | 19:45427136 | T | C | 0.026 | 0.012 | 33.8  | -0.494 | 0.085 | $6.43 \times 10^{-9}$   | 0.121  | 0.110 | 0.272 |
| AD | rs150685845 | 19:45675180 | G | A | 0.013 | 0.008 | 73.2  | 0.556  | 0.065 | $6.62 \times 10^{-18}$  | 0.043  | 0.050 | 0.388 |
| PD | rs35749011* | 1:155135036 | A | G | 0.019 | 0.021 | 129.5 | 0.751  | 0.066 | $5.02 \times 10^{-30}$  | -0.052 | 0.033 | 0.111 |
| PD | rs823106    | 1:205656453 | C | G | 0.849 | 0.006 | 38.5  | -0.149 | 0.024 | $4.10 \times 10^{-10}$  | 0.011  | 0.019 | 0.557 |
| PD | rs6741007   | 2:135537119 | G | T | 0.451 | 0.008 | 46.7  | -0.123 | 0.018 | $2.09 \times 10^{-12}$  | 0.006  | 0.014 | 0.657 |
| PD | rs4613239   | 2:169119609 | G | C | 0.133 | 0.007 | 50.7  | 0.178  | 0.025 | $6.21 \times 10^{-13}$  | 0.029  | 0.022 | 0.194 |
| PD | rs4488803   | 3:58218352  | A | G | 0.375 | 0.006 | 32.5  | -0.114 | 0.020 | $1.08 \times 10^{-8}$   | 0.002  | 0.014 | 0.882 |
| PD | rs10513789  | 3:182760073 | G | T | 0.183 | 0.008 | 52.9  | -0.160 | 0.022 | $3.18 \times 10^{-13}$  | -0.019 | 0.017 | 0.272 |
| PD | rs34311866  | 4:951947    | C | T | 0.196 | 0.016 | 97.4  | 0.227  | 0.023 | $7.97 \times 10^{-23}$  | -0.020 | 0.017 | 0.225 |
| PD | rs4698412   | 4:15737348  | A | G | 0.553 | 0.008 | 54.9  | 0.126  | 0.017 | $7.05 \times 10^{-14}$  | -0.018 | 0.014 | 0.193 |
| PD | rs7695720   | 4:77183300  | C | A | 0.209 | 0.005 | 36.0  | -0.126 | 0.021 | $1.53 \times 10^{-9}$   | 0.015  | 0.016 | 0.365 |



|     |             |              |   |   |       |       |       |        |       |                        |        |       |       |
|-----|-------------|--------------|---|---|-------|-------|-------|--------|-------|------------------------|--------|-------|-------|
| PD  | rs356203    | 4:90666041   | T | C | 0.617 | 0.027 | 177.8 | -0.240 | 0.018 | $3.01 \times 10^{-41}$ | -0.006 | 0.014 | 0.696 |
| PD  | rs75646569  | 5:60345424   | G | T | 0.112 | 0.007 | 50.6  | 0.192  | 0.027 | $5.62 \times 10^{-13}$ | 0.024  | 0.023 | 0.286 |
| PD  | rs35265698  | 6:32561334   | G | C | 0.155 | 0.010 | 44.4  | -0.200 | 0.030 | $3.93 \times 10^{-11}$ | 0.010  | 0.019 | 0.581 |
| PD  | rs858295    | 7:23245569   | G | A | 0.395 | 0.005 | 33.4  | -0.104 | 0.018 | $3.83 \times 10^{-9}$  | 0.015  | 0.014 | 0.291 |
| PD  | rs620490    | 8:16697579   | G | T | 0.276 | 0.006 | 37.9  | -0.117 | 0.019 | $6.46 \times 10^{-10}$ | -0.004 | 0.014 | 0.762 |
| PD  | rs144814361 | 10:121410917 | T | C | 0.017 | 0.007 | 42.1  | 0.441  | 0.068 | $9.07 \times 10^{-11}$ | -0.013 | 0.088 | 0.884 |
| PD  | rs329647    | 11:133764666 | C | G | 0.666 | 0.006 | 39.4  | -0.113 | 0.018 | $1.94 \times 10^{-10}$ | 0.013  | 0.018 | 0.461 |
| PD  | rs75505347  | 12:40885549  | T | C | 0.020 | 0.006 | 34.2  | 0.392  | 0.067 | $6.12 \times 10^{-9}$  | -0.061 | 0.057 | 0.289 |
| PD  | rs10847864  | 12:123326598 | T | G | 0.363 | 0.008 | 49.8  | 0.127  | 0.018 | $9.81 \times 10^{-13}$ | 0.006  | 0.014 | 0.698 |
| PD  | rs4774417   | 15:61993702  | A | G | 0.740 | 0.004 | 30.5  | 0.105  | 0.019 | $4.63 \times 10^{-8}$  | -0.019 | 0.015 | 0.202 |
| PD  | rs12934900  | 16:30923602  | T | A | 0.657 | 0.007 | 45.9  | 0.122  | 0.018 | $4.33 \times 10^{-11}$ | 0.007  | 0.014 | 0.619 |
| PD  | rs10451230  | 17:16035225  | T | A | 0.565 | 0.005 | 28.4  | -0.096 | 0.018 | $4.42 \times 10^{-8}$  | 0.013  | 0.014 | 0.347 |
| PD  | rs58879558* | 17:44095467  | C | T | 0.223 | 0.020 | 90.6  | -0.238 | 0.025 | $1.36 \times 10^{-21}$ | 0.035  | 0.021 | 0.096 |
| PD  | rs4588066   | 18:40672964  | A | G | 0.326 | 0.005 | 34.0  | 0.105  | 0.018 | $4.45 \times 10^{-9}$  | 0.001  | 0.014 | 0.962 |
| ALS | rs10463311  | 5:150410835  | T | C | 0.744 | 0.003 | 28.2  | -0.085 | 0.016 | $4.00 \times 10^{-8}$  | 0.011  | 0.015 | 0.492 |
| ALS | rs3849943   | 9:27543382   | T | C | 0.752 | 0.012 | 121.0 | -0.176 | 0.016 | $3.77 \times 10^{-30}$ | -0.003 | 0.018 | 0.885 |
| ALS | rs142321490 | 12:58676132  | C | G | 0.018 | 0.004 | 38.6  | 0.317  | 0.051 | $6.15 \times 10^{-10}$ | 0.016  | 0.042 | 0.704 |

|     |            |             |   |   |       |       |      |       |       |                        |       |       |       |
|-----|------------|-------------|---|---|-------|-------|------|-------|-------|------------------------|-------|-------|-------|
| ALS | rs74654358 | 12:64881967 | A | G | 0.047 | 0.004 | 33.9 | 0.198 | 0.034 | $4.66 \times 10^{-9}$  | 0.008 | 0.035 | 0.826 |
| ALS | rs12973192 | 19:17753239 | G | C | 0.325 | 0.006 | 65.1 | 0.121 | 0.015 | $3.92 \times 10^{-15}$ | 0.008 | 0.014 | 0.588 |
| ALS | rs75087725 | 21:45753117 | A | C | 0.015 | 0.008 | 59.1 | 0.515 | 0.067 | $1.85 \times 10^{-14}$ | 0.025 | 0.047 | 0.590 |

Note: As for instrumental SNPs for the exposure, proportion of variance explained was calculated using the formula:  $R^2 = 2 \times \text{EAF} \times (1 - \text{EAF}) \times \text{Beta}^2$ . Strength of individual SNP was approximated by the formula:  $F\text{-statistic} = (\text{Beta}/\text{SE})^2$ , where  $F < 10$  was seen as a weak instrument. Effect allele frequency for instrumental variable of AD was not available in the original GWAS, and hence was retrieved by searching LDlink in the EUR sub-population (1000 Genomes Phase 3).

\* In the summary statistics of low back pain two proxy SNPs were utilized for rs35749011 (rs35682329, chr1:155121143,  $r^2 = 1$ ) and rs58879558 (rs62062271, chr17: 44091988,  $r^2 = 0.99$ ).

Abbreviations: AD, Alzheimer's disease; ALS, amyotrophic lateral sclerosis; EA, effect allele; EAF, effect allele frequency of instrumental SNP associated with the exposure; LBP, low back pain; SE, standard error; OA, other allele; PD, Parkinson's disease; SNP, single nucleotide polymorphism.

**Supplementary Table 4.** Mendelian randomization analysis power estimation

| Exposure | No. of SNPs | PVE   | Outcome | Outcome sample size | <i>K</i> | OR detected with adequate power (>80%) |
|----------|-------------|-------|---------|---------------------|----------|----------------------------------------|
| LBP      | 17          | 0.036 | AD      | 63,926              | 0.344    | $\leq 0.882$ , or $\geq 1.129$         |
| LBP      | 17          | 0.036 | PD      | 482,730             | 0.070    | $\leq 0.917$ , or $\geq 1.084$         |
| LBP      | 17          | 0.036 | ALS     | 80,610              | 0.258    | $\leq 0.885$ , or $\geq 1.122$         |
| AD       | 20          | 0.262 | LBP     | 177,860             | 0.074    | $\leq 0.951$ , or $\geq 1.050$         |
| PD       | 23          | 0.206 | LBP     | 177,860             | 0.074    | $\leq 0.944$ , or $\geq 1.056$         |
| ALS      | 6           | 0.036 | LBP     | 177,860             | 0.074    | $\leq 0.867$ , or $\geq 1.136$         |

Note: Assuming a power of 80% and an alpha of 5%, we calculated the minimum detectable OR using the web application, mRnd (<https://shiny.cnsgenomics.com/mRnd/>) with input parameters: (1) PVE, proportion of variance explained for the association between instrumental SNPs with the exposure; (2) the outcome sample size; and (3) *K*, proportion of cases in the association study of the outcome of interest.

Abbreviations: AD, Alzheimer's disease; ALS, amyotrophic lateral sclerosis; LBP, low back pain; PD, Parkinson's disease; SNP, Single-nucleotide polymorphism.

**Supplementary Table 5.** MR-Egger regression intercepts examining unbalanced horizontal pleiotropy

| Exposures and outcomes | Number of SNPs | MR-Egger regression |                |                 |
|------------------------|----------------|---------------------|----------------|-----------------|
|                        |                | Intercept           | Standard error | <i>P</i> -value |
| LBP on AD              | 17             | 0.017               | 0.014          | 0.246           |
| LBP on PD              | 17             | 0.021               | 0.022          | 0.357           |
| LBP on ALS             | 17             | 0.015               | 0.013          | 0.273           |
| AD on LBP              | 20             | 0.007               | 0.007          | 0.307           |
| PD on LBP              | 23             | 0.002               | 0.007          | 0.792           |
| ALS on LBP             | 6              | -0.010              | 0.017          | 0.598           |

Abbreviations: AD, Alzheimer’s disease; ALS, amyotrophic lateral sclerosis; LBP, low back pain; PD, Parkinson’s disease; SNP, Single-nucleotide polymorphism.

**Supplementary Table 6.** Heterogeneity assessment by Cochran's Q statistics

| Exposures and outcomes | Number of SNPs | Cochran's <i>Q</i> test |                       |                 |
|------------------------|----------------|-------------------------|-----------------------|-----------------|
|                        |                | <i>Q</i> -statistic     | <i>I</i> <sup>2</sup> | <i>P</i> -value |
| LBP on AD              | 17             | 14.5                    | 0                     | 0.564           |
| LBP on PD              | 17             | 19.4                    | 17.6%                 | 0.248           |
| LBP on ALS             | 17             | 11.1                    | 0                     | 0.805           |
| AD on LBP              | 20             | 25.5                    | 25.5%                 | 0.144           |
| PD on LBP              | 23             | 16.3                    | 0                     | 0.801           |
| ALS on LBP             | 6              | 0.9                     | 0                     | 0.970           |

Note: *I*<sup>2</sup> statistic measured the percentage of variation across instrumental variants that is due to heterogeneity,  $I^2 = (Q-df)/Q \times 100\%$ , where  $df = N-1$ ,  $df$  was degree of freedom,  $N$  was number of instrumental SNPs.

Abbreviations: AD, Alzheimer's disease; ALS, amyotrophic lateral sclerosis; LBP, low back pain; PD, Parkinson's disease; SNP, Single-nucleotide polymorphism.

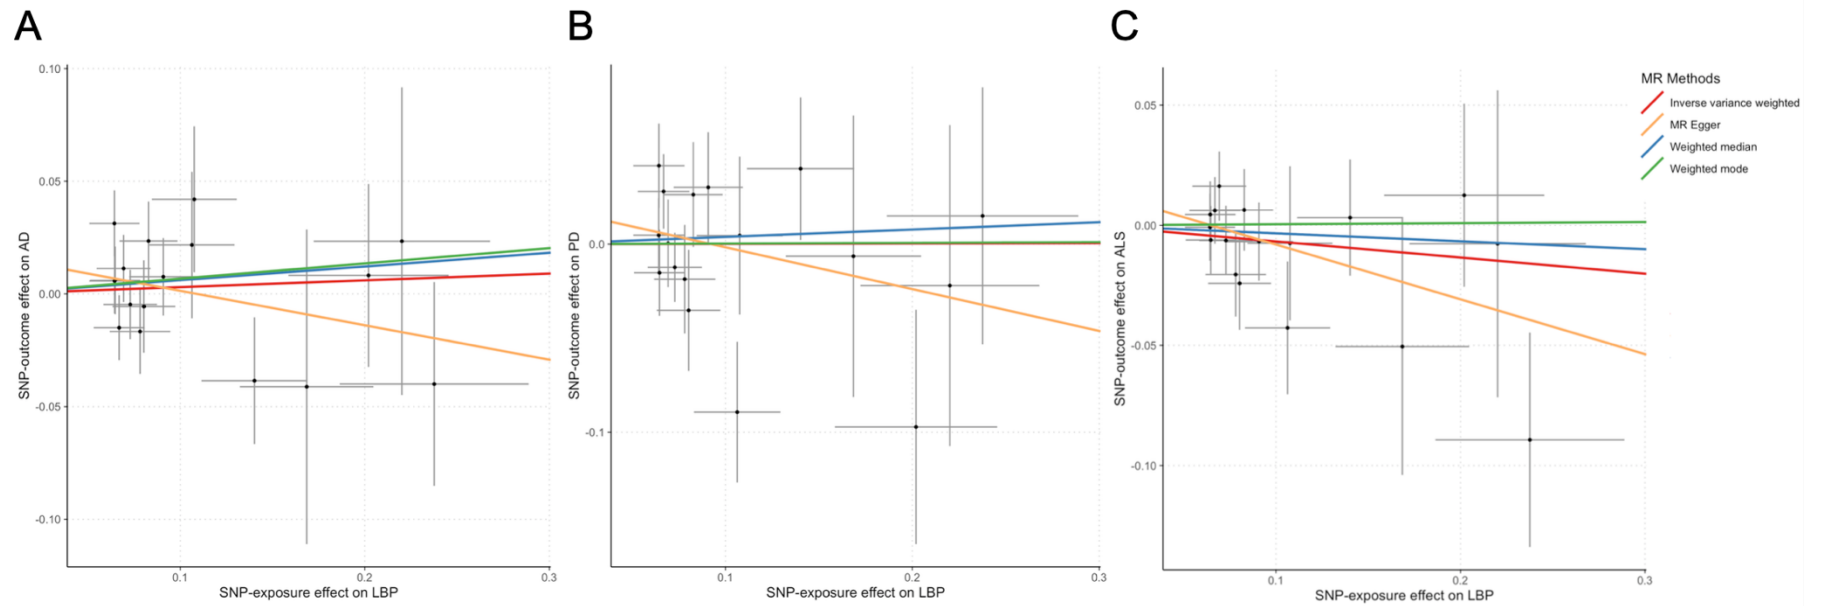

**Supplementary Figure 1.** Scatter plots in the Mendelian randomization analyses of low back pain on neurodegenerative diseases

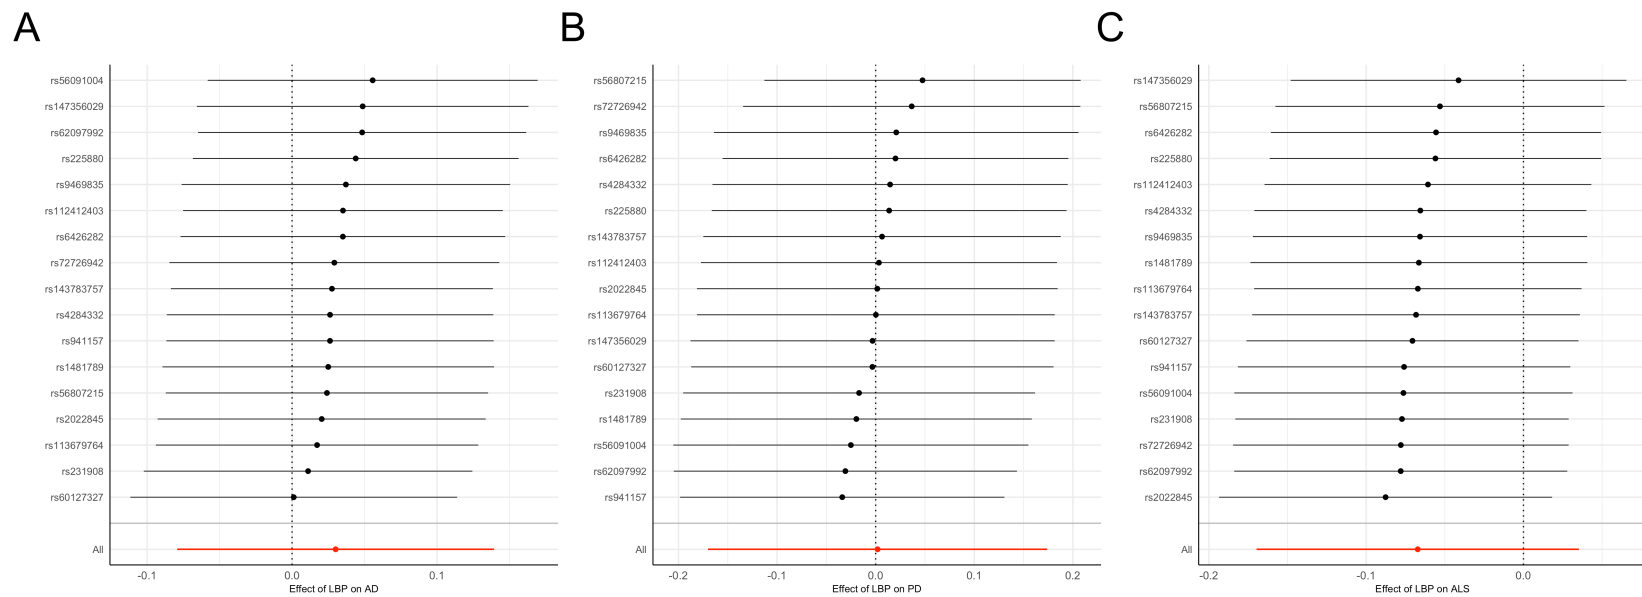

**Supplementary Figure 2.** Leave-one-out plots in the Mendelian randomization analyses of low back pain on neurodegenerative diseases

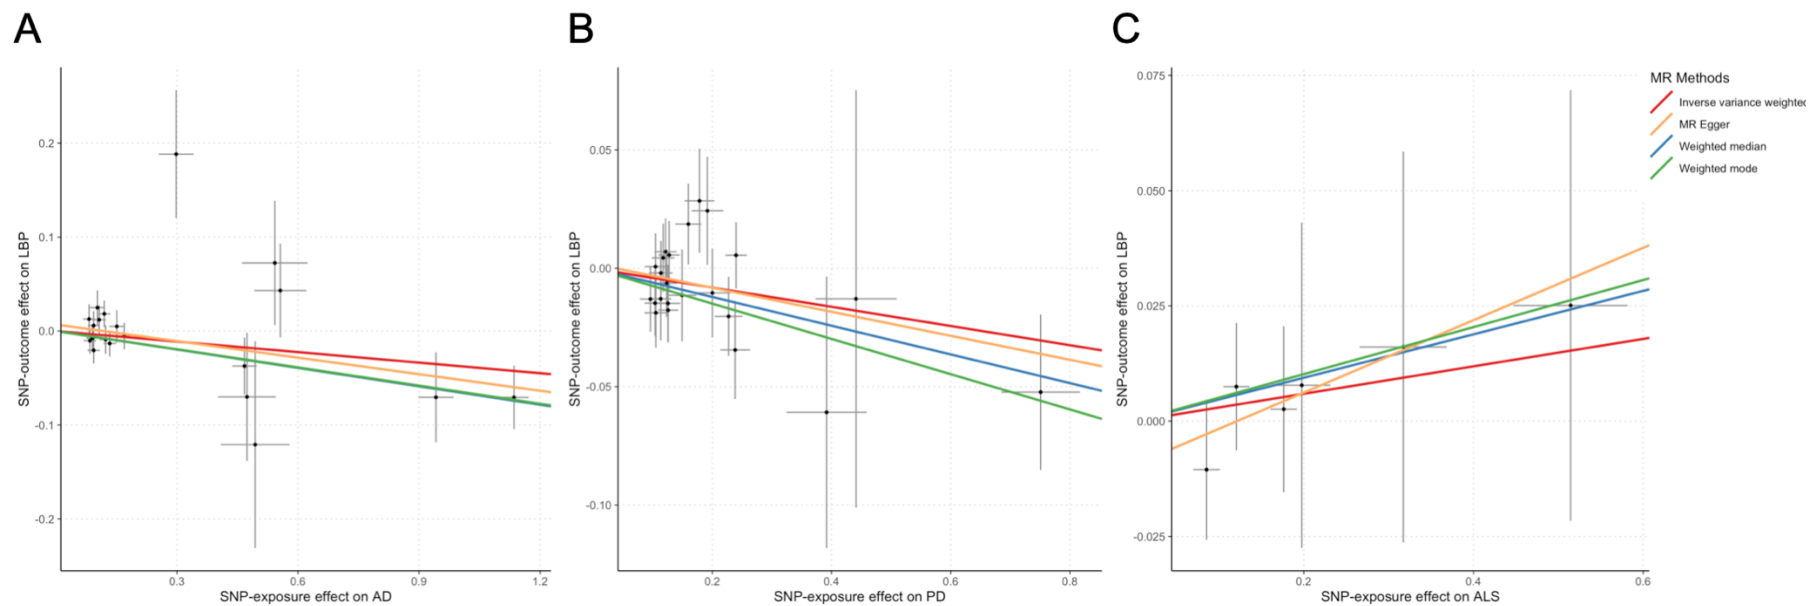

**Supplementary Figure 3.** Scatter plots in the Mendelian randomization analyses of neurodegenerative diseases on low back pain



**A**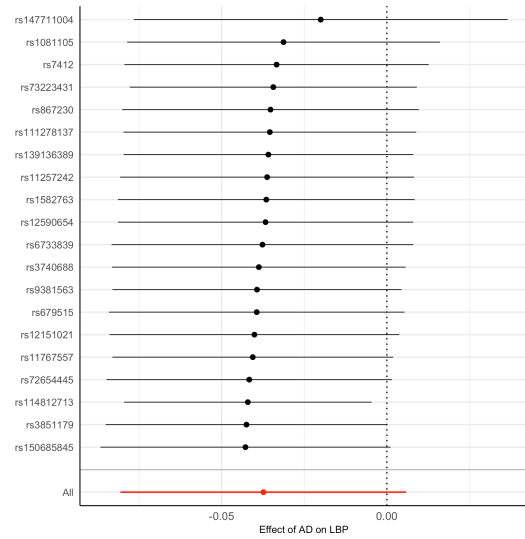**B**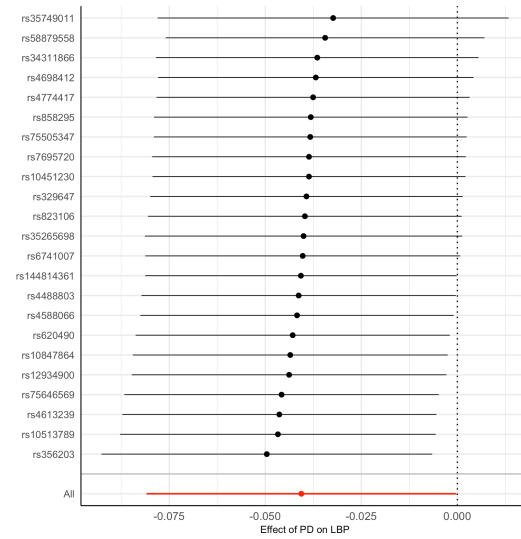**C**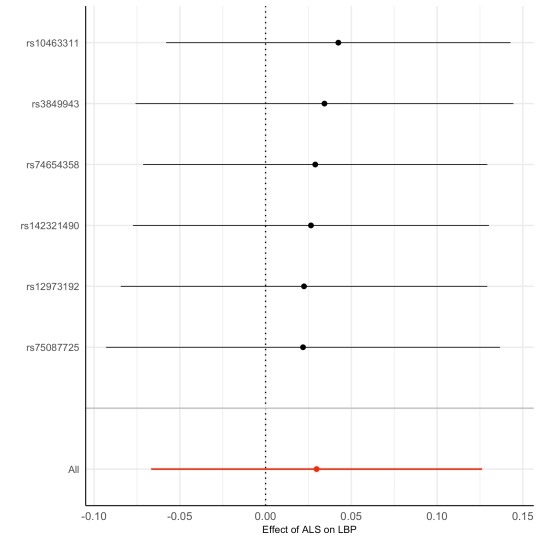

**Supplementary Figure 4.** Leave-one-out plots in the Mendelian randomization analyses of neurodegenerative diseases on low back pain
